# Supplementary material for: Pyroptosis patterns of colon cancer could aid to estimate prognosis, microenvironment and immunotherapy: evidence from multi-omics analysis
Source: Aging (Albany NY). 2022 Sep 23;14(18):7547–67. doi: 10.18632/aging.204302 (PMC9550258; doi:10.18632/aging.204302)
Supplement: Supplementary Figures [file aging-14-204302-s001.pdf]

## SUPPLEMENTARY FIGURES

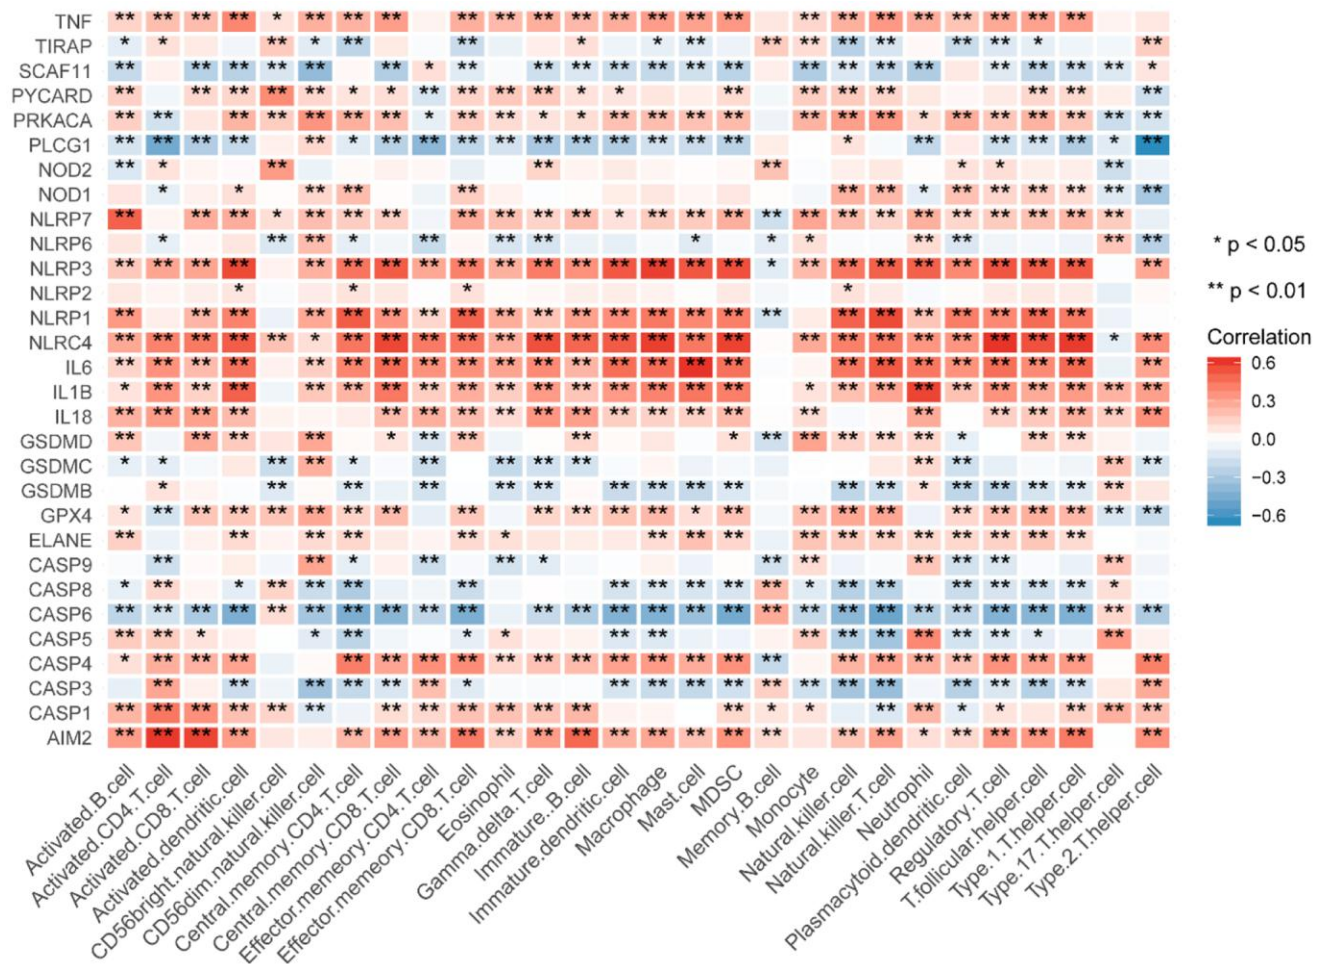

**Supplementary Figure 1. Spearman analysis was used to obtain the correlation between each TME infiltrating cell type and PRGs. Blue represented negative correlation and red represented positive correlation.**

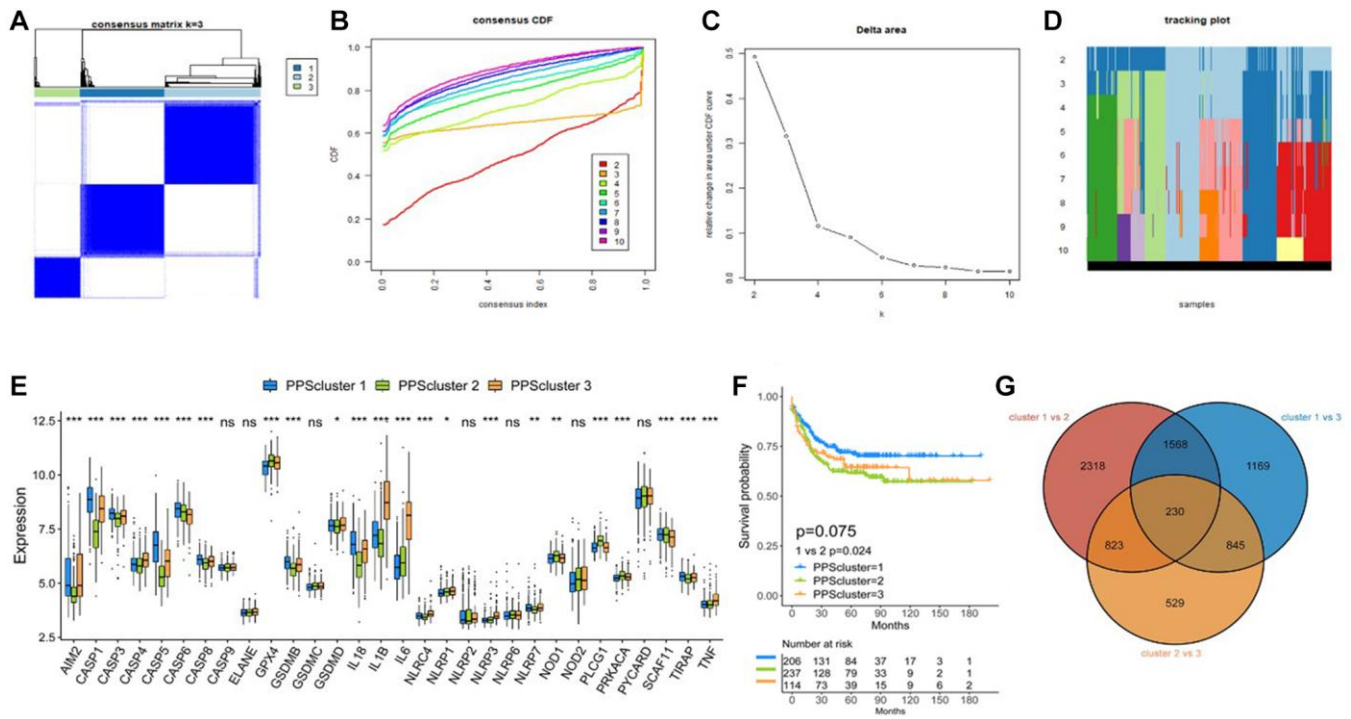

**Supplementary Figure 2. Unsupervised clustering of 30 PRGs in GSE39582 CC cohort.** (A) The heatmap of consensus matrices for GSE39582 CC cohort ( $k = 3$ ). (B) Empirical cumulative distribution function (CDF) plots displayed consensus distributions for each  $k$ . (C) The delta area score (y-axis) indicated the relative increase in cluster stability. (D) The item tracking plot showed the consensus cluster of items (in columns) at each  $k$  (in rows). (E) The expression of 30 PRGs in the three PPSclusters ( $*P < 0.05$ ;  $**P < 0.01$ ;  $***P < 0.001$ ). (F) Survival analyses for the three pyroptosis patterns in GSE39582 using Kaplan-Meier curves. (G) 230 overlapping DEGs related to pyroptosis phenotype were shown in Venn diagram.

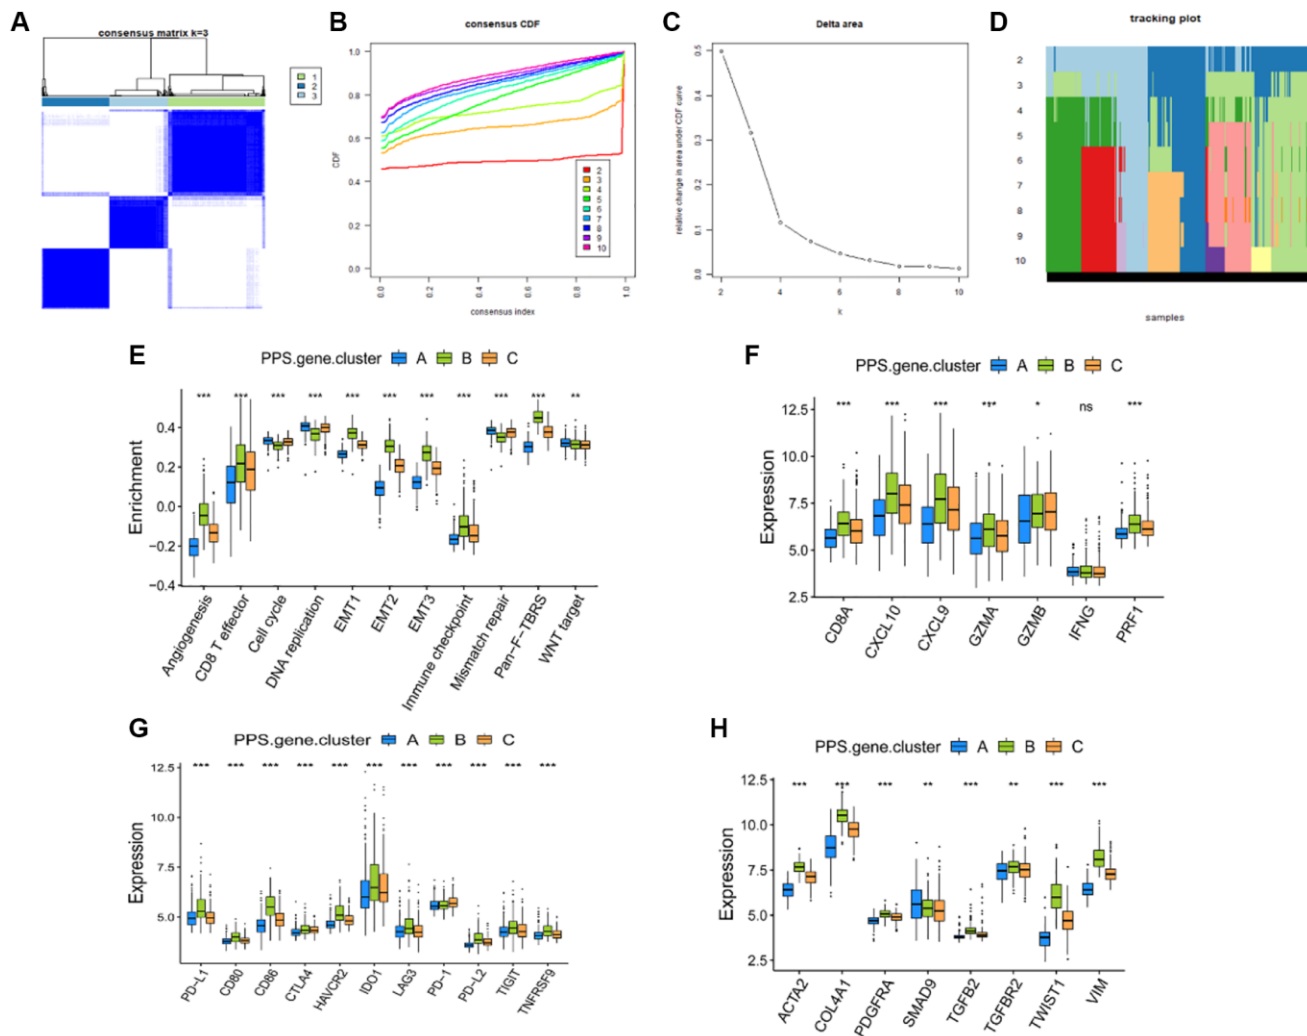

**Supplementary Figure 3. Characteristics of cytokine transcriptome, chemokine transcriptome and known signatures in distinct gene clusters.** (A) The heatmap of consensus matrices for GSE39582 CC cohort ( $k = 3$ ). (B) Empirical cumulative distribution function plots displayed consensus distributions for each  $k$ . (C) The delta area score (y-axis) indicated the relative increase in cluster stability. (D) The item tracking plot showed the consensus cluster of items (in columns) at each  $k$  (in rows). (E) Difference in the expression of known signatures including stromal-activation related signatures, tumor-promotion related signatures and immune-activation related signatures among three gene clusters ( $*P < 0.05$ ;  $**P < 0.01$ ;  $***P < 0.001$ ). (F) Difference in the immune-activation related gene expression among three gene clusters. (G) Difference in the immune-checkpoint related gene expression among three gene clusters. (H) Difference in the TGF $\beta$ -EMT pathway-related gene expression among three gene clusters.

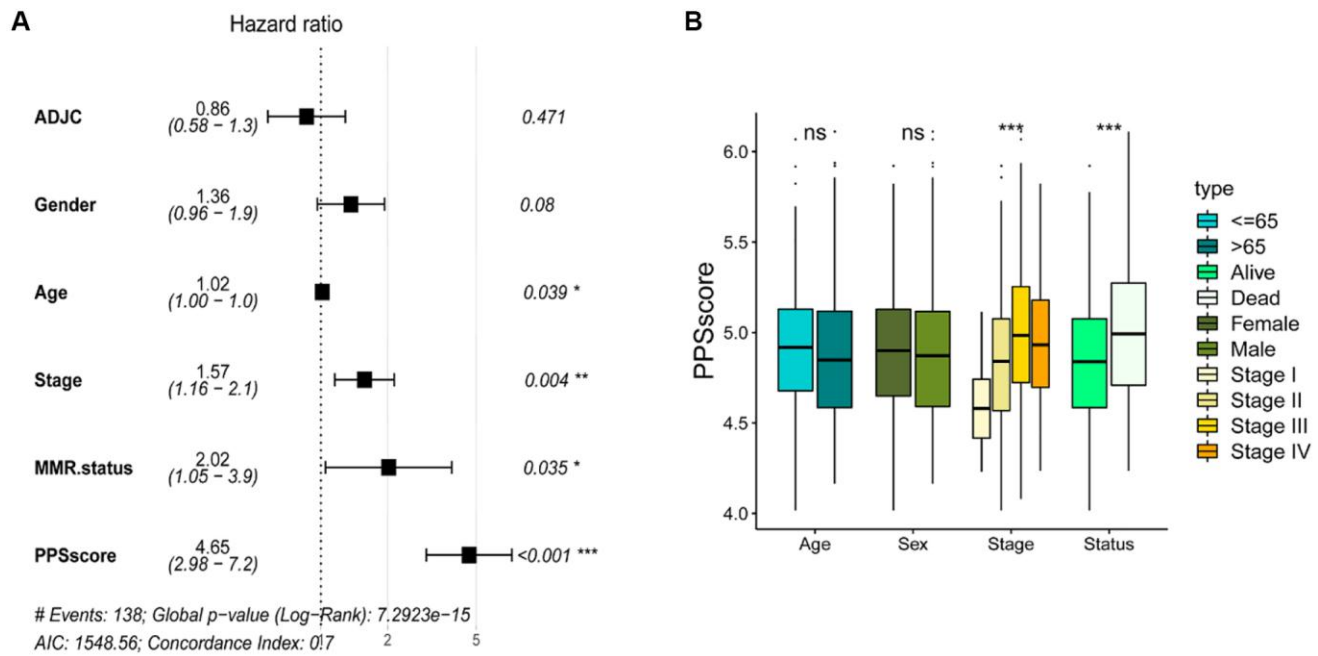

**Supplementary Figure 4. The prognostic value of PPScore and the correlation between the clinicopathological features and PPScore.** (A) Multivariate Cox regression analysis for PPScore in GSE39582 cohort shown by the forest plot. (B) Difference in PPScore among distinct clinical subgroups in GSE39582 cohort. ADJC, adjuvant chemotherapy.

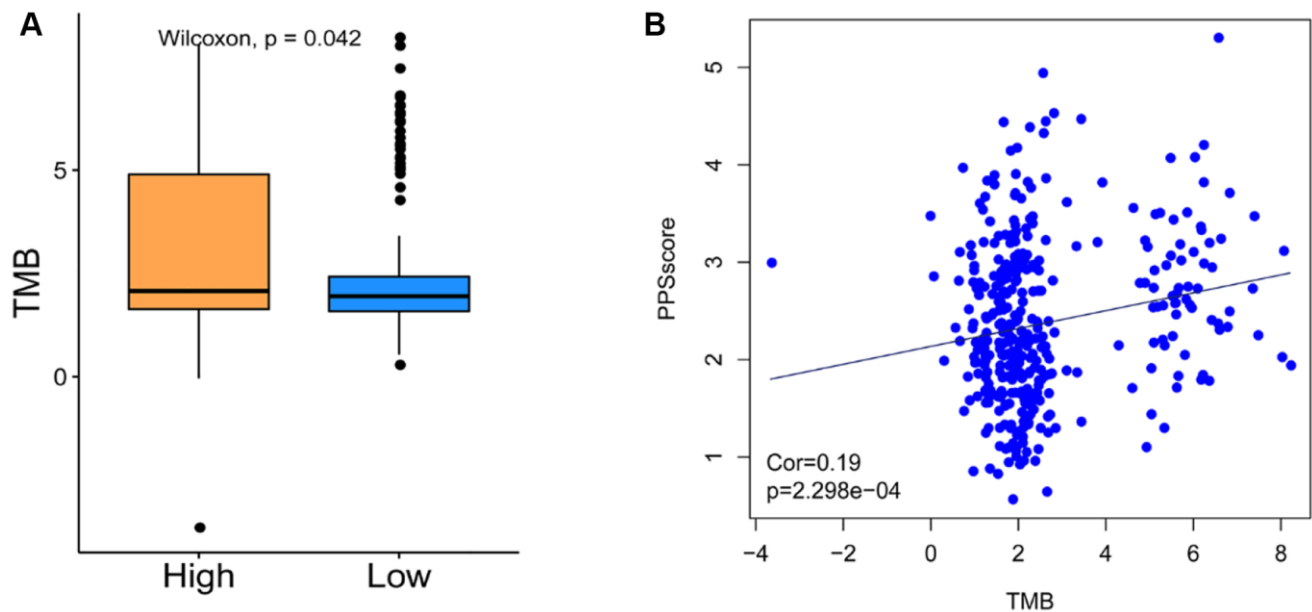

**Supplementary Figure 5. The relationship between tumor mutation burden (TMB) and PPScore.** (A) The distribution of tumor mutation burden (TMB) in distinct PPScore groups ( $P = 0.042$ , Wilcoxon test). (B) There was a positive correlation between TMB and PPScore ( $r = 0.19$ ,  $P < 0.001$ ).

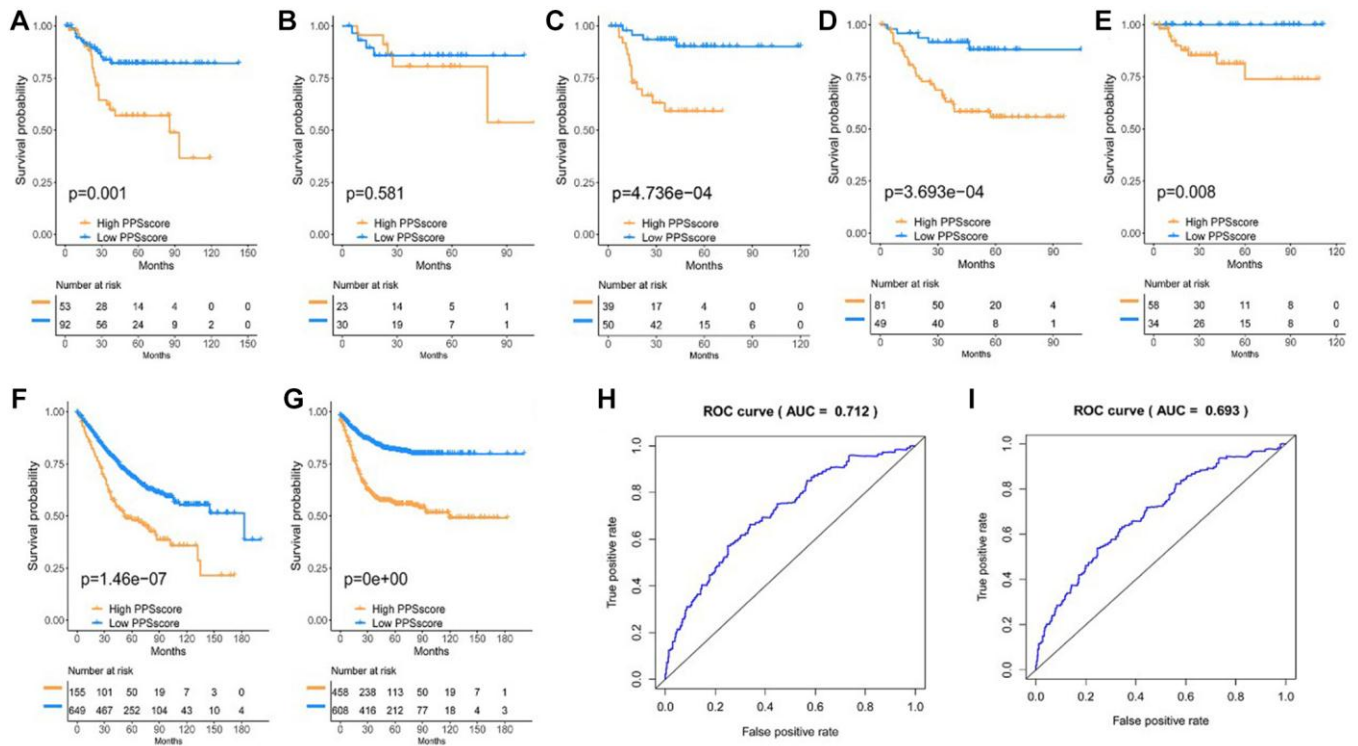

**Supplementary Figure 6. The prognostic value of PPScore in CC cohorts.** Survival analyses for low and high PPScore patient groups in (A) GSE17536, (B) GSE29621, (C) GSE33113, (D) GSE37892 and (E) GSE38832 using Kaplan-Meier curves. (F) Overall survival analysis of PPScore in all GEO CC cohorts. (G) Relapse-free survival analysis of PPScore in all GEO CC cohorts. (H) The predictive power of the PPScore signature on 3-year survival in GSE39582 cohort (AUC = 0.712). (I) The predictive power of the PPScore signature on 5-year survival in GSE39582 cohort (AUC = 0.693).
