# Supplementary material for: Pyroptosis patterns of colon cancer could aid to estimate prognosis, microenvironment and immunotherapy: evidence from multi-omics analysis
Source: publisher site journal article supplement (doi:10.18632/aging.204302), 2022-09-23
Supplement: Supplementary file [file aging-v14i18-204302-supplementary-material-SD2.pdf]

## SUPPLEMENTARY TABLE

**Supplementary Table 1. The GEO and TCGA datasets included in this study.**

| <b>Accession number</b> | <b>Source</b>                               | <b>Number of patients</b> | <b>Survival</b> |
|-------------------------|---------------------------------------------|---------------------------|-----------------|
| TCGA: COAD              | Illumina RNAseq                             | 514                       | OS              |
| GEO: GSE39582           | Affymetrix Human Genome U133 Plus 2.0 Array | 585                       | RFS/OS          |
| GEO: GSE38832           | Affymetrix Human Genome U133 Plus 2.0 Array | 122                       | RFS/OS          |
| GEO: GSE37892           | Affymetrix Human Genome U133 Plus 2.0 Array | 130                       | RFS             |
| GEO: GSE33113           | Affymetrix Human Genome U133 Plus 2.0 Array | 96                        | RFS             |
| GEO: GSE29621           | Affymetrix Human Genome U133 Plus 2.0 Array | 65                        | RFS/OS          |
| GEO: GSE17536           | Affymetrix Human Genome U133 Plus 2.0 Array | 177                       | RFS/OS          |
